# Supplementary material
Source: PubMed Central journal article supplement (PMC7002030)
Supplement: NIHMS935136-supplement-Toy_Exposure_Inventory.pdf [file NIHMS935136-supplement-Toy_Exposure_Inventory.pdf]

Online supplement for Boe, J. L., & Woods, R. J. (2017). Parents' influence on infants' gender-typed toy preferences. *Sex Roles*. Rebecca Woods, North Dakota State University. Email: [rebecca.woods@ndsu.edu](mailto:rebecca.woods@ndsu.edu)

## Toy Exposure Inventory For 3 – 18 months

|                   |
|-------------------|
| Date: ___/___/___ |
| Subject #: _____  |

### Participant and Parent Information

Child's Date of Birth: \_\_\_/\_\_\_/\_\_\_      Your Sex:   Male   Female   Intersex

Child's Sex (please circle):   Male   Female   Intersex      Your Age: \_\_\_\_\_

What is your child's birth order?   Only child    First child    Second    Third    Other \_\_\_\_\_

Does your child attend Day-Care? Yes    No

If yes, approximately how many hours in a typical week does your child spend at Day-Care: \_\_\_\_\_

How long has your child been attending childcare?

Less than 3 months    3 - 6 months    7 - 12 months    More than 12 months

### Family Characteristics

Child lives with:   Mother    Father    Other \_\_\_\_\_

Number of siblings who live with your child: \_\_\_\_\_

List age and sex of each sibling in the home (e.g., 5 years, female; 7 years, male) . \_\_\_\_\_

\_\_\_\_\_

### Instructions:

For each toy group listed below, please check  the box for the number of equal or SIMILAR toys you have in your house.

Please read carefully each group general description before deciding if you have this type of toy.

Please check  the box to indicate the approximate number of hours per week your child plays with each toy type.

**FIGURES ARE ONLY EXAMPLES** to help you better understand the description. You do not need to have the exact toy represented to count it in the group. SIMILAR toys and of the same TYPE should be counted.

#### 1. Hand toys: simple rattles and teething rings

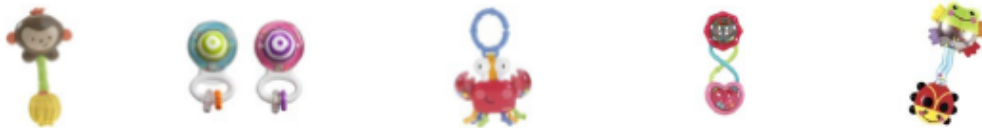

How many toys like these does your child have?

None:    One:    Two:    Three:    Four:    Five:    More than Five:

How often does your child play with these toys in typical a week?

Never:    1-2 hours    3-4 hours:    5-6 hours:    7-8 hours:    More than 8 hours:

## 2. Stuffed toys

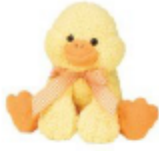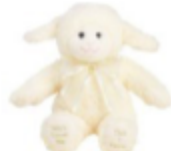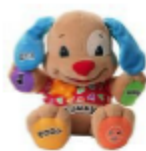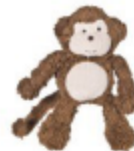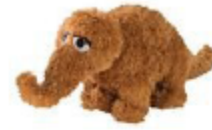

How many toys like these does your child have?

None:  One:  Two:  Three:  Four:  Five:  More than Five:

How often does your child play with these toys in typical a week?

Never:  1-2 hours:  3-4 hours:  5-6 hours:  7-8 hours:  More than 8 hours:

## 3. Dolls and play figures

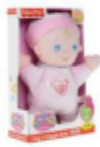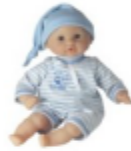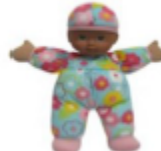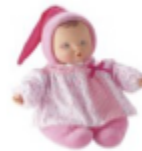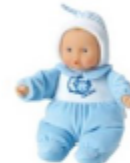

How many toys like these does your child have?

None:  One:  Two:  Three:  Four:  Five:  More than Five:

How often does your child play with these toys in typical a week?

Never:  1-2 hours:  3-4 hours:  5-6 hours:  7-8 hours:  More than 8 hours:

## 4. Books with pictures (cloth, card board or plastic)

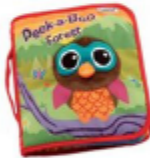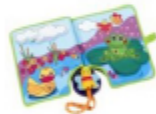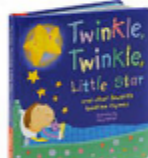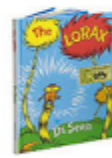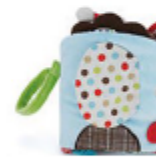

How many toys like these does your child have?

None:  One:  Two:  Three:  Four:  Five:  More than Five:

How often does your child play with these toys in typical a week?

Never:  1-2 hours:  3-4 hours:  5-6 hours:  7-8 hours:  More than 8 hours:

## 5. Blocks and Lego type bricks, small play construction sets

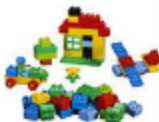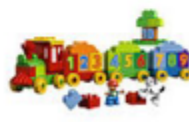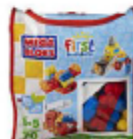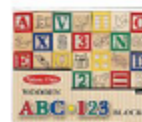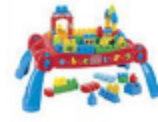

How many sets of toys like these does your child have?

None:  One:  Two:  Three:  Four:  Five:  More than Five:

How often does your child play with these toys in typical a week?

Never:  1-2 hours:  3-4 hours:  5-6 hours:  7-8 hours:  More than 8 hours:

6. Puzzles (2 to 12 pieces)

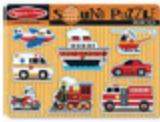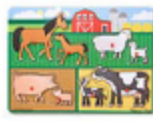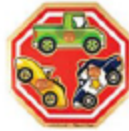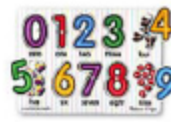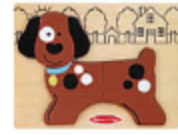

How many toys like these does your child have?

None:  One:  Two:  Three:  Four:  Five:  More than Five:

How often does your child play with these toys in typical a week?

Never:  1-2 hours:  3-4 hours:  5-6 hours:  7-8 hours:  More than 8 hours:

7. Household item toys: kitchen utensil sets, vacuums

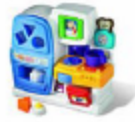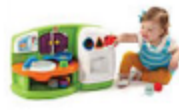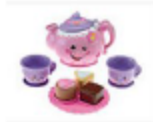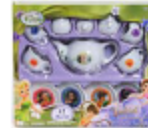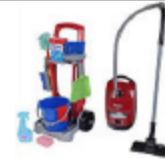

How many toys like these does your child have?

None:  One:  Two:  Three:  Four:  Five:  More than Five:

How often does your child play with these toys in typical a week?

Never:  1-2 hours:  3-4 hours:  5-6 hours:  7-8 hours:  More than 8 hours:

8. Balls of different sizes, textures, colors and shapes

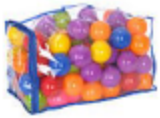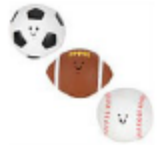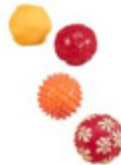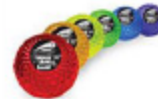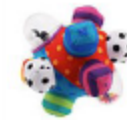

How many toys like these does your child have?

None:  One:  Two:  Three:  Four:  Five:  More than Five:

How often does your child play with these toys in typical a week?

Never:  1-2 hours:  3-4 hours:  5-6 hours:  7-8 hours:  More than 8 hours:

9. Musical materials: instruments, music boxes, mobiles, etc.

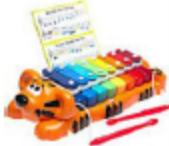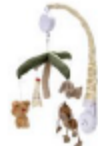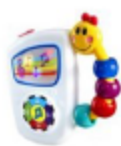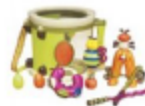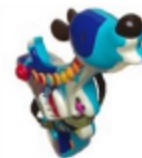

How many toys like these does your child have?

None:  One:  Two:  Three:  Four:  Five:  More than Five:

How often does your child play with these toys in typical a week?

Never:  1-2 hours:  3-4 hours:  5-6 hours:  7-8 hours:  More than 8 hours:

10. Vehicle Toys: trains, helicopters, trucks, cars, etc.

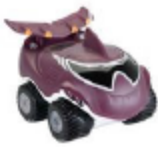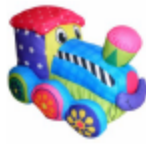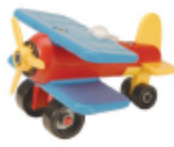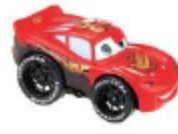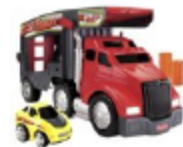

How many toys like these does your child have?

None:  One:  Two:  Three:  Four:  Five:  More than Five:

How often does your child play with these toys in typical a week?

Never:  1-2 hours:  3-4 hours:  5-6 hours:  7-8 hours:  More than 8 hours:

11. Dress-up toys and accessories

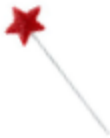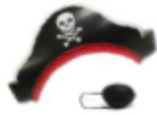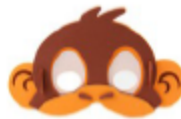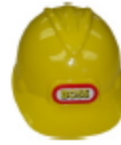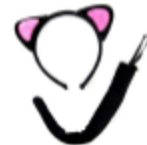

How many toys like these does your child have?

None:  One:  Two:  Three:  Four:  Five:  More than Five:

How often does your child play with these toys in typical a week?

Never:  1-2 hours:  3-4 hours:  5-6 hours:  7-8 hours:  More than 8 hours:

12. Baby swings and rocking toys

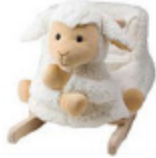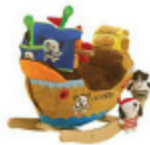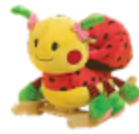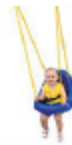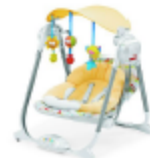

How many toys like these does your child have?

None:  One:  Two:  Three:  Four:  Five:  More than Five:

How often does your child play with these toys in typical a week?

Never:  1-2 hours:  3-4 hours:  5-6 hours:  7-8 hours:  More than 8 hours:

13. Tools

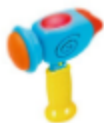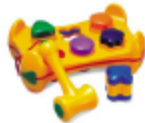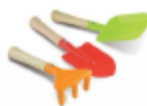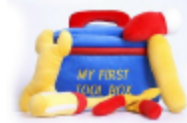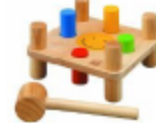

How many toys like these does your child have?

None:  One:  Two:  Three:  Four:  Five:  More than Five:

How often does your child play with these toys in typical a week?

Never:  1-2 hours:  3-4 hours:  5-6 hours:  7-8 hours:  More than 8 hours:

**Instructions:**

Please check  the box indicate the approximate number of toys of each color your child has. Place a check  the box to indicate the percent of time your child plays with these toys relative to toys of other colors in a typical week.

|                                                                                     |                                                                                                                                                                                                                                                                                                                                                                                                                                                                                                                                                                     |
|-------------------------------------------------------------------------------------|---------------------------------------------------------------------------------------------------------------------------------------------------------------------------------------------------------------------------------------------------------------------------------------------------------------------------------------------------------------------------------------------------------------------------------------------------------------------------------------------------------------------------------------------------------------------|
|    | <p>How many BRIGHT MULTICOLORED toys does your child have?</p> <p>None: <input type="checkbox"/> 1-2: <input type="checkbox"/> 3-4: <input type="checkbox"/> 5-6: <input type="checkbox"/> 7-8: <input type="checkbox"/> 9-10: <input type="checkbox"/> More than 10: <input type="checkbox"/></p> <p>How often does your child play with BRIGHT MULTICOLORED toys compared to other toys in a typical week?</p> <p>0%-9% <input type="checkbox"/> 10%-50% <input type="checkbox"/> 51%-99% <input type="checkbox"/> 100% <input type="checkbox"/></p>              |
|    | <p>How many PASTEL COLORED toys does your child have?</p> <p>None: <input type="checkbox"/> 1-2: <input type="checkbox"/> 3-4: <input type="checkbox"/> 5-6: <input type="checkbox"/> 7-8: <input type="checkbox"/> 9-10: <input type="checkbox"/> More than 10: <input type="checkbox"/></p> <p>How often does your child play with PASTEL COLORED toys compared to other toys in a typical week?</p> <p>0%-9% <input type="checkbox"/> 10%-50% <input type="checkbox"/> 51%-99% <input type="checkbox"/> 100% <input type="checkbox"/></p>                        |
|    | <p>How many MOSTLY BLUE toys does your child have?</p> <p>None: <input type="checkbox"/> 1-2: <input type="checkbox"/> 3-4: <input type="checkbox"/> 5-6: <input type="checkbox"/> 7-8: <input type="checkbox"/> 9-10: <input type="checkbox"/> More than 10: <input type="checkbox"/></p> <p>How often does your child play with MOSTLY BLUE toys compared to other toys in a typical week?</p> <p>0%-9% <input type="checkbox"/> 10%-50% <input type="checkbox"/> 51%-99% <input type="checkbox"/> 100% <input type="checkbox"/></p>                              |
|   | <p>How many MOSTLY YELLOW OR MOSTLY GREEN toys does your child have?</p> <p>None: <input type="checkbox"/> 1-2: <input type="checkbox"/> 3-4: <input type="checkbox"/> 5-6: <input type="checkbox"/> 7-8: <input type="checkbox"/> 9-10: <input type="checkbox"/> More than 10: <input type="checkbox"/></p> <p>How often does your child play with MOSTLY YELLOW OR GREEN toys compared to other toys in a typical week?</p> <p>0%-9% <input type="checkbox"/> 10%-50% <input type="checkbox"/> 51%-99% <input type="checkbox"/> 100% <input type="checkbox"/></p> |
|  | <p>How many MOSTLY PURPLE toys does your child have?</p> <p>None: <input type="checkbox"/> 1-2: <input type="checkbox"/> 3-4: <input type="checkbox"/> 5-6: <input type="checkbox"/> 7-8: <input type="checkbox"/> 9-10: <input type="checkbox"/> More than 10: <input type="checkbox"/></p> <p>How often does your child play with MOSTLY PURPLE toys compared to other toys in a typical week?</p> <p>0%-9% <input type="checkbox"/> 10%-50% <input type="checkbox"/> 51%-99% <input type="checkbox"/> 100% <input type="checkbox"/></p>                          |
|  | <p>How many MOSTLY RED toys does your child have?</p> <p>None: <input type="checkbox"/> 1-2: <input type="checkbox"/> 3-4: <input type="checkbox"/> 5-6: <input type="checkbox"/> 7-8: <input type="checkbox"/> 9-10: <input type="checkbox"/> More than 10: <input type="checkbox"/></p> <p>How often does your child play with MOSTLY RED toys compared to other toys in a typical week?</p> <p>0%-9% <input type="checkbox"/> 10%-50% <input type="checkbox"/> 51%-99% <input type="checkbox"/> 100% <input type="checkbox"/></p>                                |
|  | <p>How many MOSTLY PINK toys does your child have?</p> <p>None: <input type="checkbox"/> 1-2: <input type="checkbox"/> 3-4: <input type="checkbox"/> 5-6: <input type="checkbox"/> 7-8: <input type="checkbox"/> 9-10: <input type="checkbox"/> More than 10: <input type="checkbox"/></p> <p>How often does your child play with MOSTLY PINK toys compared to other toys in a typical week?</p> <p>0%-9% <input type="checkbox"/> 10%-50% <input type="checkbox"/> 51%-99% <input type="checkbox"/> 100% <input type="checkbox"/></p>                              |
